# Supplementary material for: The ABoVE L-band and P-band Airborne SAR Surveys
Source: Copernicus journal article supplement (doi:10.5194/essd-2021-172), 2023-09-15
Supplement: Supplementary file 2 [file essd-2021-172-supplement.zip]

Search ORNL DAAC

in  
Q Search

DAAC Home > Get Data > NASA Projects > Arctic-Boreal Vulnerability Experiment (ABoVE) > User guide

# Summary of the ABoVE L-band and P-band Airborne SAR Surveys, 2012-2022

## Get Data

Documentation Revision Date: 2023-06-13

Dataset Version: 1

## Summary

This dataset contains tables containing Airborne flight metadata from synthetic aperture radar (SAR) surveys from 2012 to 2022 in Alaska and Canada as part of NASA's Arctic Boreal Vulnerability Experiment (ABoVE). ABoVE conducted airborne SAR surveys of over 120,000 km<sup>2</sup> in Alaska and northwestern Canada during 2017, 2018, 2019, and 2022. The data files and companion file contain L-band and P-band airborne SAR metadata acquired during the ABoVE airborne campaigns. Included are detailed descriptions of ~80 SAR flight lines and how each fits into the ABoVE experimental design. Extensive maps, tables, and hyperlinks give direct access to every flight plan as well as individual flight lines. This entry is a guide to enable interested readers to fully explore the ABoVE L- and P-band SAR data.

This dataset includes 37 data files in comma-separated values (\*.csv) format and one file in Portable Document Format (\*.pdf) format.

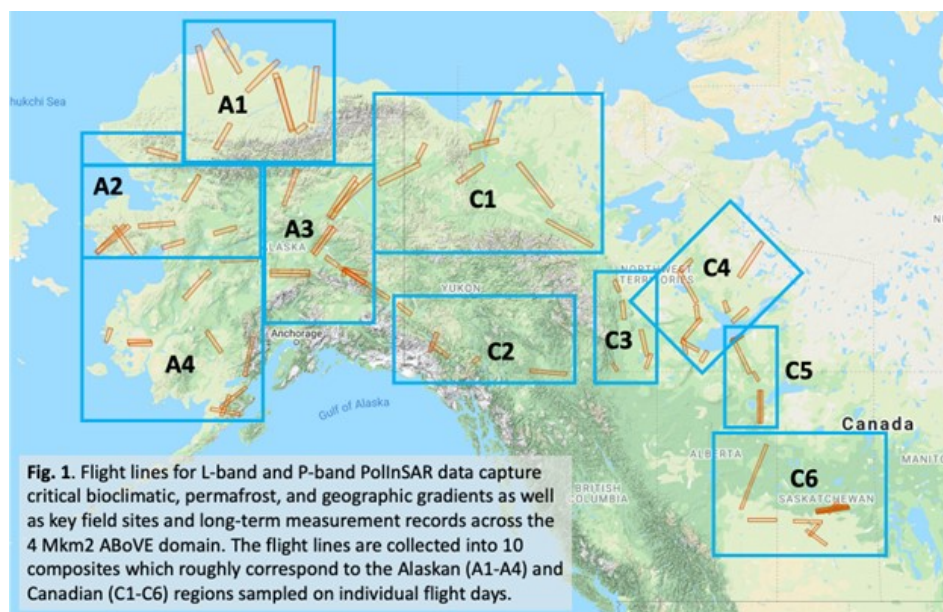

Figure 1. Flight lines for L-band and P-band PolInSAR measurements capture critical bioclimatic, permafrost, and geographic gradients as well as key field sites and long-term measurement records across the ABoVE domain. The flight lines are collected into 10 composites which roughly correspond to the Alaskan (A1-A4) and Canadian (C1-C6) regions sampled on individual flight days. Basemap source: Google Maps.

## Citation

Miller, C.E., P. Griffith, E.E. Hoy, N. Pinto, Y. Lou, S. Hensley, B. Chapman, J.L. Baltzer, K. Bakian-Dogaheh, W.R. Bolton, L.L. Bourgeau-Chavez, R.H. Chen, B.-H. Choe, L.K. Clayton, T.A. Douglas, N.H.F. French, J.E. Holloway, G. Hong, L. Huang, G. Iwahana, L.K. Jenkins, J.S. Kimball, T.V. Loboda, M.C. Mack, P. Marsh, R.J. Michaelides, M. Moghaddam, A.D. Parsekian, K. Schaefer, P. Siqueira, D. Singh, A. Tabatabaeeenejad, M.R. Turetsky, R. Touzi, E. Wig, P. Wilson, C.J. Wilson, S.D. Wulschleger, Y. Yi, H.A. Zebker, Y. Zhang, Y. Zhao, and S.J. Goetz. 2023. Summary of the ABoVE L-band and P-band Airborne SAR Surveys, 2012-2022. ORNL DAAC, Oak Ridge, Tennessee, USA. <https://doi.org/10.3334/ORNLDAAC/2150>

## Table of Contents

- [1. Dataset Overview](#)
- [2. Data Characteristics](#)
- [3. Application and Derivation](#)
- [4. Quality Assessment](#)
- [5. Data Acquisition, Materials, and Methods](#)

## 1. Dataset Overview

This dataset contains tables containing Airborne flight metadata from synthetic aperture radar (SAR) surveys from 2012 to 2022 in Alaska and Canada as part of NASA's Arctic Boreal Vulnerability Experiment (ABoVE). ABoVE conducted airborne SAR surveys of over 120,000 km<sup>2</sup> in Alaska and northwestern Canada during 2017, 2018, 2019, and 2022. The data files and companion file contain L-band and P-band airborne SAR metadata acquired during the ABoVE airborne campaigns. Included are detailed descriptions of ~80 SAR flight lines and how each fits into the ABoVE experimental design. Extensive maps, tables, and hyperlinks give direct access to every flight plan as well as individual flight lines. This entry is a guide to enable interested readers to fully explore the ABoVE L- and P-band SAR data.

**Project:** [ABoVE](#)

The Arctic-Boreal Vulnerability Experiment (ABoVE) is a NASA Terrestrial Ecology Program field campaign being conducted in Alaska and western Canada, for 8 to 10 years, starting in 2015. Research for ABoVE links field-based, process-level studies with geospatial data products derived from airborne and satellite sensors, providing a foundation for improving the analysis, and modeling capabilities needed to understand and predict ecosystem responses to, and societal implications of, climate change in the Arctic and Boreal regions.

### Related Datasets:

Related data are available on the [ABoVE Project page](#).

### Acknowledgements:

The L- and P-band SAR data acquisitions would not have been possible without the indefatigable support of our NASA pilots and flight crews. We thank John McGrath and the NASA AFRC C-20 (N30502) team as well as Derek Rutovic and the NASA JSC G-III (N995NA) team. We also thank the instrument scientists, operators, and data processing team from the JPL Suborbital Radar Science and Engineering Team (334F) who were essential to the successful execution of these experiments and rapid processing of the resulting data products. The field work supporting the SAR campaigns was made possible by the excellent support from Dan Hodgkinson, Sarah Sackett, and the ABoVE Logistics Office. Finally, we thank the data curation team at the Oak Ridge National Laboratory Distributed Active Archive Center for their support and expert advice.

This work was supported by the NASA Terrestrial Ecology Program's Arctic-Boreal Vulnerability Experiment (ABoVE). A portion of this work was performed at the Jet Propulsion Laboratory, California Institute of Technology, under contract with National Aeronautics and Space Administration (80NM0018D0004).

## 2. Data Characteristics

**Spatial Coverage:** Alaska, USA and Canada

**Spatial Resolution:** Locations throughout the ABoVE study domain

**Temporal Coverage:** 2012-01-01 to 2022-12-31

**Temporal Resolution:** Irregular flights throughout temporal coverage window

**Study Areas:** Latitude and longitude are given in decimal degrees.

| Site              | Westernmost Longitude | Easternmost Longitude | Northernmost Latitude | Southernmost Latitude |
|-------------------|-----------------------|-----------------------|-----------------------|-----------------------|
| Alaska and Canada | -169                  | -102                  | 72                    | 50                    |

### Data File Information

This dataset includes 37 files in comma-separated values (\*.csv) format and one file in Portable Document Format (\*.pdf).

The file *Summary\_of\_the\_ABoVE\_L-band\_and\_P-band\_Airborne\_SAR\_Surveys.pdf* contains L-band and P-band airborne SAR metadata acquired during the ABoVE airborne campaigns. Included are detailed descriptions of ~80 SAR flight lines and how each fits into the ABoVE experimental design. Extensive maps, tables, and hyperlinks give direct access to every flight plan as well as individual flight lines.

Each \*.csv (e.g. *Table\_1\_ABoVE\_L-band\_PolInSAR\_Campaign\_1.csv*) coincides with a table in the PDF document. These files contain details regarding airborne SAR flights, including the flight plan number and a URL to flight plan summary at [uavsar.jpl.nasa.gov](https://uavsar.jpl.nasa.gov).

**Table 1.** Data dictionary for CSV data files (Table\_\*.csv). Each file contains a subset of these fields.

| Variable           | Units      | Description                                                                                 |
|--------------------|------------|---------------------------------------------------------------------------------------------|
| Flight_plan        |            | Airborne flight plan number                                                                 |
| Flight_plan_url    |            | URL to flight plan summary at <a href="https://uavsar.jpl.nasa.gov">uavsar.jpl.nasa.gov</a> |
| Sortie_date        | YYYY-MM-DD | Flight date                                                                                 |
| Region_sampled     |            | Region sampled                                                                              |
| Region_sampled_url |            | URL to flight plan map at <a href="https://uavsar.jpl.nasa.gov">uavsar.jpl.nasa.gov</a>     |
| PolInSAR_band      |            | SAR band; L or P-band                                                                       |
| Campaign           |            | Name of airborne campaign                                                                   |
| Line_ID            |            | Flight line ID                                                                              |

| Short_name |            | Flight line name                                                                                                               |
|------------|------------|--------------------------------------------------------------------------------------------------------------------------------|
| Flight     |            | Airborne flight plan number. Synonymous to 'Flight_plan'                                                                       |
| Flight_url |            | URL to flight plan summary at <a href="https://uavsar.jpl.nasa.gov">uavsar.jpl.nasa.gov</a> . Synonymous to 'Flight_plan_url'. |
| Band       |            | SAR band; L or P-band                                                                                                          |
| Date       | YYYY-MM-DD | Flight date. Synonymous to 'Sortie_date'.                                                                                      |
| Region     |            | Region sampled. Synonymous to 'Region_sampled'                                                                                 |
| Comments   |            | Contains additional details about the flight line                                                                              |

### 3. Application and Derivation

These files enable interested readers to fully explore the ABoVE L- and P-band synthetic aperture radar (SAR) data. See Miller et al. (2019) for an overview of the ABoVE airborne campaign and discussion of the L-band and P-band SAR within the context of the ABoVE project.

### 4. Quality Assessment

None provided.

### 5. Data Acquisition, Materials, and Methods

Please refer to the documentation file, *Summary\_of\_the\_ABoVE\_L-band\_and\_P-band\_Airborne\_SAR\_Surveys.pdf*, for methodology details.

### 6. Data Access

These data are available through the Oak Ridge National Laboratory (ORNL) Distributed Active Archive Center (DAAC).

[Summary of the ABoVE L-band and P-band Airborne SAR Surveys, 2012-2022](#)

Contact for Data Center Access Information:

- E-mail: [uso@daac.ornl.gov](mailto:uso@daac.ornl.gov)
- Telephone: +1 (865) 241-3952

### 7. References

Miller, C.E., P.C. Griffith, S.J. Goetz, E.E. Hoy, N. Pinto, I.B. McCubbin, A.K. Thorpe, M. Hofton, D. Hodkinson, C. Hansen, J. Woods, E. Larson, E.S. Kasischke, and H.A. Margolis. 2019. An overview of ABoVE airborne campaign data acquisitions and science opportunities. *Environmental Research Letters* 14:080201. <https://doi.org/10.1088/1748-9326/ab0d44>

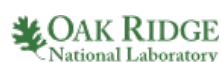

[Privacy Policy](#) | [Feedback](#) | [Help](#)

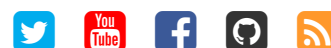

#### 🏠 Home

#### About Us

Mission  
Data Use and Citation  
Policy  
User Working Group  
Partners

#### Get Data

Science Themes  
NASA Projects  
All Datasets

#### Submit Data

Submit Data Form  
Data Scope and  
Acceptance  
Data Authorship Policy  
Data Publication Timeline  
Detailed Submission  
Guidelines

#### Tools

MODIS  
THREDDS  
SDAT  
Daymet  
Airborne Data Visualizer  
Soil Moisture Visualizer  
Land - Water Checker

#### Resources

Learning  
Data Management  
News  
Earthdata Forum [↗](#)

#### 💬 Contact Us
